# Supplementary material
Source: Research Square preprint supplement (doi:10.21203/rs.3.rs-10308858/v1)
Supplement: Supplementary file 1 [file f5e30286e624b075538c1a5a.xlsx]

## Sheet: Screening and extraction
Title of Article	Authors & Publication Year	Database Source	Full-Text PDF Link	Decision (Include/Exclude)	Rationale	Core focus and models used	PINK1/Parkin/Mitophagy gaps	Implications for review objectives
Mitochondrial nanomedicine: Subcellular organelle-specific delivery of molecular medicines	Milane L et al., 2021	PubMed	https://doi.org/10.1016/j.nano.2021.102422	Exclude	Review paper/Missing downstream mitophagy markers	This study investigated mitochondrial nanomedicine, specifically how nanotechnology-based drug delivery systems can be used to transport therapeutic molecules directly to mitochondria within cells. The authors explained the role of mitochondria in health and disease, discussed different mitochondrial-targeting strategies, and reviewed the potential medical applications of these approaches. Becaus…	Although the review discusses mitochondrial dysfunction in Parkinson's disease and briefly notes that some forms of the disease are associated with defective PINK1 and Parkin proteins, it does not really provide a detailed examination of the PINK1/Parkin-mediated mitophagy pathway. The article mostly focuses on mitochondrial-targeted drug delivery systems and nanomedicine strategies rather than t…	It is very important because it demonstrates the growing potential of mitochondrial-targeted nanomedicine for treating diseases associated with mitochondrial dysfunction, including Parkinson's disease. However, while the authors briefly mention that defects in PINK1 and Parkin contribute to mitochondrial dysfunction, they do not thoroughly explore the mechanisms of PINK1/Parkin-mediated mitophagy…
A novel nanoparticle system targeting damaged mitochondria for the treatment of Parkinson's disease	Chen Y et al., 2022	PubMed	https://doi.org/10.1016/j.bioadv.2022.212876	Include	Directly tests an engineered nanoparticle matrix explicitly targeting the canonical PINK1/Parkin axis in an active Parkinson's disease model. Low risk of bias except for concerns about uncontrolled confounding. While minor reporting omissions exist (lack of explicit randomization/blinding details), the core biochemical outcome data is complete and statistically sound.	This study investigated a dual-stage engineered nanoparticle (NP) platform designed to target and treat sequential phases of mitochondrial damage in Parkinson’s disease. Mild/reversible damage (Stage 1) was addressed using protective hyaluronic acid nanoparticles (HA-NPs, optimal formulation 2190 kDa) to restore bioenergetics and homeostatic dynamics. Irreversible damage (stage 2) was treated usi…	Despite operating within the PINK1/Parkin mechanistic framework, this study did not execute standard, direct mitophagy flux assays. The authors completely omitted explicit evaluations of the LC3-II/I conversion ratio, p62/SQSTM1 protein clearance assays, or direct Parkin protein translocation metrics (tracking its physical translocation from the cytosol to the outer mitochondrial membrane). Inste…	This inclusion matters because it represents the only identified study in our scoping review that explicitly bridges an engineered therapeutic nanoparticle matrix with a targeted downstream intervention on the canonical PINK1/Parkin axis. However, it simultaneously exposes a critical methodological baseline gap in the current literature: even within the single study that successfully met all incl…
Piperine-Coated Gold Nanoparticles Alleviate Paraquat-Induced Neurotoxicity in Drosophila melanogaster	Srivastav S et al., 2020	PubMed	https://sci-hub.ru/10.1021/acschemneuro.0c00366	Exclude	Missing downstream mitophagy markers	This study investigated the neuroprotective potential of engineered piperine-coated gold nanoparticles (AuNPs-Piperine) as a therapeutic strategy against Parkinson-like symptoms triggered by the herbicide paraquat. The researchers used a dual-model approach with both the in vivo Drosophila melanogaster (fruit fly) system and the in vitro human neuroblastoma SH-SY5Y cell line to observe the treatm…	Despite using an engineered nanoparticle matrix, this paper was excluded because it lacks the specific biochemical evidence required to prove the activation of the PINK1/Parkin pathway. While the authors did track changes in Parkin mRNA levels and used computer modeling to show how piperine mat bind to Parkin proteins, they did not measure any direct downstream markers of the actual cascade. Spec…	This exclusion is important because it highlights a major gap in current literature, that many studies assume that if a treatment improves mitochondrial health or changes Parkin expression, it must be repairing the PINK1/Parkin pathway. However, as this paper demonstrates, a treatment can improve survival and reduce cell death through general antioxidant effects without ever proving the specific …
Using Extracellular Vesicles Released by GDNF-Transfected Macrophages for Therapy of Parkinson Disease	Zhao Y et al., 2022	PubMed	https://www.mdpi.com/2073-4409/11/12/1933	Exclude	Missing downstream mitophagy markers	The study developed and characterized a macrophage-derived extracellular vesicle (EV) delivery platform engineered to carry glial-cell-line-derived neurotrophic factor (GDNF) via ex vivo macrophage transfection. EVs secreted by GDNF-transfected macrophages were collected, characterized for GDNF content, size, charge, and EV-specific protein markers, then tested for neuroprotective therapeutic eff…	Despite using a Parkin-mutation PD model, the study measured no downstream indicators of the PINK1/Parkin mitophagy signaling cascade. Specifically absent are: LC3-II/I ratio, p62/SQSTM1 clearance, Beclin-1 expression, PINK1 kinase activity, Parkin mitochondrial translocation or ubiquitination activity, and mitophagic flux assays. The Parkin Q311(X)A genotype was used solely to generate a progres…	This paper is a direct illustration of the gap our review set out to address. A study using a Parkin-mutant transgenic model and a nanoparticle-class delivery vehicle (EVs) measures neuroprotective and symptomatic outcomes exclusively, bypassing the mitophagy pathway that the Parkin mutation directly disrupts. It demonstrates that even when the disease model is genetically defined by a PINK1/Park…
GDNF-expressing macrophages restore motor functions at a severe late-stage, and produce long-term neuroprotective effects at an early-stage of Parkinson's disease in transgenic Parkin Q311X(A) mice	Zhao Y et al., 2019	PubMed	https://sci-hub.ru/10.1016/j.jconrel.2019.10.027	Exclude	Missing downstream mitophagy markers	This study tested GDNF-transfected macrophages in a transgenic Parkin Q311X(A) mice as a means of treatment for Parkinson's disease. Such treatments were shown to reinstate mobility in in late stage Parkinson's for some of these Parkin Q311X(A) mice. Intravenous treatment was shown to improve brain tissue health. Overall, treatment was shown to be highly effective with diminished neuroinflammatio…	While the study included a strong discussion of macrophages as potential treatments in the PINK1/Parkin pathway, it failed to include any details regarding downstream mitophagy markers including signaling cascades. The utilization of these specific mice served as a means of highlighting the effectiveness of this treatment and not a reflection of the overall cascade pathway. This makes it incompat…	This study is reflective of a larger group of studies that are highlighting the gap that makes our research extremely necessary. While the use of macrophages as a treatment has shown to be successful in this case, its lack of discussion of the specific mitophagy markers highlights the fact that it cannot be directy attributed to such pathways. The study serves as a means of highlighting that effe…
Rescue of mitochondrial function in parkin-mutant fibroblasts using drug loaded PMPC-PDPA polymersomes and tubular polymersomes	Yealland G et al., 2016	PubMed	https://www.sciencedirect.com/science/article/pii/S0304394016304748?via%3Dihub	Exclude	Missing downstream mitophagy markers	The study evaluated the therapeutic efficacy of an engineered nanoparticle matrix--specifically spherical and tubular PMPC-PDPS polymersomesloaded with Ursolic Acid and Ursocholanic Acid. Testing was conducted in a biological, patient-derived parkin-mutant human dermal fibroblast model to measure its impact on rescuing basic mitochondrial health indexes, specifically evaluating cellular ATP flux …	While the paper utilized a parkin-mutant model, it completely omitted any assessment of the downstream molecular marker, signaing cascades, or structural proteins essential to the mitophagy clearance pathway. Specifically, it left out tracking critical clearance indicators such as LC3-II/I lipidation ratios, p62/SQSTM1 degradation, or the recruitment of alternative mitophagy machinery.	This highlights a profound gap in the exiting literature where nanotechnology studies utilise Parkin models simply as a generic background for mitochondrial distress, rather than mechanistically exploring or rescuing the actual PINK1/Parkin/Mitophagy cascade. This explicitly justifies our Empty Review status by proving that even when nanoparticles are tested on Parkin mutants, researchers stop sh…
Effects of titanium dioxide nanoparticles exposure on parkinsonism in zebrafish larvae and PC12	Hu Q et al., 2017	PubMed	https://doi.org/10.1016/j.chemosphere.2017.01.063	Exclude	Missing downstream mitophagy markers	The study tested whether TiO₂ nanoparticles induce Parkinson’s disease-like neurotoxicity. It used zebrafish embryos/larvae as the in vivo model and PC12 dopaminergic neuron-like cells as the in vitro model, measuring dopaminergic neuron loss, dopamine reduction, ROS/cell death, locomotor effects, mitochondrial dysfunction, and PD-related gene expression including pink1, parkin, α-syn, and uchl1.	The study only measured pink1/parkin mRNA expression and did not test downstream PINK1/Parkin-mediated mitophagy. It lacked Parkin mitochondrial translocation, PINK1 protein stabilization, LC3-II/I ratios, p62 clearance, mitochondrial ubiquitination, and mitophagy flux or mitochondrial clearance assays.	This shows that nanoparticle exposure can produce PD-like toxicity and alter PD-related genes, but it does not prove that TiO₂ NPs directly modulate the PINK1/Parkin mitophagy pathway. It highlights the gap between nanoparticle neurotoxicity studies and studies testing engineered nanoparticle effects on functional mitophagy mechanisms. This matters because pink1/parkin expression changes alone ar…
A secretory form of Parkin-independent mitophagy contributes to the repertoire of extracellular vesicles released into the tumour interstitial fluid in vivo	Howard, Marissa; Erickson, James; Cuba, Zachary; Kim, Shawn; Zhou, Weidong; Gade, Purva; Carter, Rachel; Mitchell, Kelsey; Branscome, Heather; Siddhi, Daivik; Alanazi, Fatimah; Kim, Yuriy; Araujo, Robyn P.; Haymond, Amanda; Luchini, Alessandra; Kashanchi, Fatah; Liotta, Lance A., 2022	Web of Science	https://doi.org/10.1002/jev2.12244	Exclude	Missing downstream mitophagy markers	This animal in vivo study examined extracellular vesicles in the interstitial fluid of breast tumors using a GFP-labelled syngeneic mouse breast cancer model. 4T1 cells (mouse-model tumour cells comparable to human triple negative breast cancer cells) were implanted in BALB/c mice. They compared the tumour EVs with those obtained from cells in culture. Specifically, EV subpopulations (2K, 10K, an…	Since the study was not designed for investigation of the PINK1/Parkin pathway of cellular mitophagy, and was instead investigating a specific type of cancer cells, the study only includes 4T1 mouse tumour cells. This means the results cannot be directly applied to other tissue types, or even other cancer cells without further study. Similar EV and mitophagy markers were identified in the human M…	In relation to our inclusion criteria, p62 and LC3-II/I were mentioned as detected in secreted EVs in the study, but not intracellularly as conventional flux readouts. Parkin itself was never directly measured, so the study neither confirms nor excludes Parkin translocation as a downstream cascade event. Finally, the observation of the Parkin-independent pathway was inferred from protein profiles…
Mitochondrial nanomedicine: Subcellular organelle-specific delivery of molecular medicines	Milane, Lara; Dolare, Saket; Jahan, Tanjheela; Amiji, Mansoor., 2021	Web of Science	https://doi.org/10.1016/j.nano.2021.102422	Exclude	Review article	This study investigates ways for mitochondrial-targeted drug delivery, including DQAsomes, mitochondrial peptides, delocalized cations, liposomes, polymeric nanoparticles, and other nanomedicine methodologies. The text analyzes mitochondrial dysfunction in neurodegenerative diseases and provides an in-depth examination of the PINK1/Parkin mitophagy pathway and its relevance to Parkinson's disease.	No laboratory experiments were conducted. The article does not evaluate nanoparticles in Parkinson's disease models for their impact on PINK1 expression, Parkin recruitment, mitochondrial protein ubiquitination, mitophagic flux, LC3 activation, or mitochondrial clearance. The discourse on PINK1/Parkin remains speculative and oriented towards foundational concepts.	The study emphasizes that mitochondrial malfunction and compromised PINK1/Parkin-mediated mitophagy are pivotal in Parkinson's disease, proposing mitochondrial nanomedicine as a potential therapeutic strategy. Nonetheless, it exposes a substantial data gap, as direct experimental investigations assessing the regulation of PINK1/Parkin-dependent mitophagy by nanotherapeutics are scarce. This under…
A novel nanoparticle system targeting damaged mitochondria for the treatment of Parkinson's disease	Chen, Yue; Zhang, Bosong; Yu, Lina; Zhang, Jinyu; Zhao, Yufang; Yao, Lifen; Yan, Hongji; Tian, Weiming., 2022	Web of Science	https://assets-eu.researchsquare.com/files/rs-989619/v1/d9d8a0e1-5b4a-45c6-834a-a37d12c09bff.pdf?c=1635863354	Exclude	Duplicate from PubMed result	Hyaluronic acid nanoparticles (HA-NPs) targeting damaged mitochondria in PD. Tested on SH-SY5Y cells and PINK1 knockout MEF cells (in vitro). HA-NPs repaired mildly damaged mitochondria; USP30 siRNA-loaded NPs with PINK1 antibodies promoted mitophagy of irreversibly damaged mitochondria.	The study uses PINK1 as a targeting marker but does not investigate the full PINK1/Parkin mitophagy cascade mechanistically. Parkin's role in ubiquitinating damaged mitochondria downstream of PINK1 is not explored, leaving the pathway's therapeutic relevance undercharacterized.	Without examining the PINK1/Parkin pathway specifically, it is unclear whether the nanoparticles are genuinely restoring mitophagy or simply removing damaged mitochondria nonselectively. This gap limits conclusions about whether the intervention targets the root mitochondrial dysfunction in PD.
Rescue of mitochondrial function in parkin-mutant fibroblasts using drug loaded PMPC-PDPA polymersomes and tubular polymersomes	Yealland, G.; Battaglia, G.; Bandmann, O.; Mortiboys, H., 2016	Web of Science	https://discovery.ucl.ac.uk/id/eprint/1506141/1/1-s2.0-S0304394016304748-main.pdf	Exclude	Duplicate from PubMed result	This study uses a Parkin (PRKN)-mutant human fibroblast model to investigate mitochondrial dysfunction linked to impaired mitophagy in Parkinson’s disease. It tests whether PMPC-PDPA polymersomes (spherical and tubular nanocarriers) can effectively deliver therapeutic drugs into cells. The main focus is on how nanoparticle shape influences cellular uptake and restoration of mitochondrial function.	The study does not directly investigate the PINK1-Parkin signaling pathway mechanisms in detail, focusing instead on functional rescue rather than molecular signaling changes. It also does not fully examine how polymersome treatment affects upstream regulation of mitophagy initiation (PINK1 stabilization or Parkin recruitment dynamics). Additionally, the work is limited to an in vitro fibroblast …	The paper focuses on rescuing mitochondrial function in parkin-mutant fibroblasts but does not directly investigate the PINK1/Parkin-mediated mitophagy pathway, which limits our ability to link the observed mitochondrial recovery to specific signaling mechanisms. As a result, it is unclear whether the improvements come from restoration of PINK1/Parkin-dependent mitophagy or from alternative, path…
Exosome-Mediated Mitochondrial Regulation: A Promising Therapeutic Tool for Alzheimer's Disease and Parkinson's Disease	Jung, Young Hyun; Jo, Hyo Youn; Kim, Dae Hyun; Oh, Yeon Ju; Kim, Minsoo; Na, Seunghyun; Song, Ho-Yeon; Lee, Hyun Jik., 2025	Web of Science	https://doi.org/10.2147/IJN.S513816	Exclude	Review article	The review studied how exosomes specifically regulate mitochondiral function and may serve as therapies for Alzheimer's and Parkinson's. It combined evidence from cell culture, animals, and clinical studies to study the mechanisms involving mitochondrial biogenesis, dynamics, transport, mitophagy, antioxidant signaling, and metabolic reprogramming	The review did not talk much about the specific mechanisms by which exosomes regulate the PINK1/Parkin mitophagy pathway, the differences between Alzheimer's and Parkinson's, and the clinical relevance of targeting PINK1/Parkin-mediated mitophagy in humans.	This matters because the review does not specifically talk about how exosomes influence the PINK1/Parkin pathway, making it difficult to fully understand how exosomes work or how they could be used as treatment
Trends on Novel Targets and Nanotechnology-Based Drug Delivery System in the Treatment of Parkinson's disease: Recent Advancement in Drug Development	Majumdar, Manisha; Badwaik, Hemant., 2024	Web of Science	https://doi.org/10.2174/0113894501312703240826070530	Exclude	Review article	This review outlines the potential benefits and challenges involved in the use of antiparkinsonian medication, or medication that takes advantage of abnormal proteins (i.e., Parkin, leucine-rich repeat serine) as alternative methods for the traditional treatment methods of PD. Various topics were studied such as drug distribution in the brain and the efficacy of nano-carriers in allowing medicati…	While the review covered treatments for Parkinson's Disease, it focused more on the mechanisms behind each drug and how it leads to improved medication delivery mechanisms rather than the pathway itself. This focus on the medication rather than the PINK1/Parkin pathway does not make this study very relevant to our topic of study.	The review does not specify the PINK1/Parkin pathway, which prevents us from fully being able to deduce a correlation between the pathway and the potential results of these drug developments, to lead to any conclusion about the pathway we are studying.
Therapeutic Efficacy of Small Extracellular Vesicles Loaded with ROCK Inhibitor in Parkinson’s Disease	Carbajal C.; Rodriguez M.; Owens F.; Stone N.; Veeragoni D.; Fan R.Z.; Tieu K.; El-Hage N. 2025	Scopus	https://doi.org/10.3390/pharmaceutics17030365	Exclude	Missing engineered nanoparticle matrix	This study investigated the therapeutic potential of macrophage-derived small extracellular vesicles (sEVs) loaded with a ROCK inhibitor in experimental Parkinson's disease models. The authors evaluated neuroprotective effects through assessments of mitochondrial function, mitophagy activity, and downstream PINK1/Parkin-related markers. Those markers included LC3-II/I ratios, Parkin-associated si…	Although the study measured downstream indicators associated with PINK1/Parkin-mediated mitophagy, it did not employ an engineered synthetic nanoparticle delivery matrix. Instead, the therapeutic cargo was delivered using naturally derived extracellular vesicles. Consequently, the study does not provide evidence regarding how engineered nanoparticle platforms influence PINK1/Parkin signaling, mit…	This exclusion highlights a gap in that while extracellular vesicle-based systems may modulate mitophagy-related pathways, there remains a limitation in the evidence examining whether engineered nanoparticle carriers, specifically, can enhance PINK1/Parkin-mediated mitophagy and mitochondrial quality control in Parkinson's disease. Addressing this gap would likely be very important for determinin…
Parkin modulates endosomal organization and function of the endo-lysosomal pathway	Song P.; Trajkovic K.; Tsunemi T.; Krainc D., 2016	Scopus	https://sci-hub.ru/10.1523/jneurosci.2569-15.2016	Exclude	Missing engineered nanoparticle matrix	The study investigated a novel, previously underappreciated role of Parkin, beyond its well-known involvement in mitophagy and proteasomal degradation, specifically its role in regulating the endo-lysosomal pathwa	PINK1 was entirely absent, no mitophagy readouts were included, the relationship between rab7 ubiquitination and mitophagy was left unresolved, and there wereno rescue experiments connecting endosomal defects back to neurodegeneration.	The paper found that Parkin regulates Rab7 at the endosome, but never tested whether that regulation is PINK1-dependent, stress-responsive, or connected to the autophagic role of Rab7 , leaving the relationship between its new finding and the established PINK1/Parkin/mitophagy axis completely unresolved.
Mitochondrial nanomedicine: Subcellular organelle-specific delivery of molecular medicines	Milane L.; Dolare S.; Jahan T.; Amiji M., 2021	Scopus	https://doi.org/10.1016/j.nano.2021.102422	Exclude	Review article	The study covers mitochondrial biology, mitochondrial-targeted drug delivery methods, nanomedicine platforms, mitochondrial peptides, DQAsomes, and the applications of mitochondrial nanomedicine in disorders such as Alzheimer's disease, Parkinson's disease, cardiovascular disease, and cancer. It also presents a summary of the PINK1/Parkin mitophagy pathway and its function in mitochondrial qualit…	The study neither does fresh studies nor assesses whether any particular nanoparticle, nanocarrier, or nanotherapeutic directly influences PINK1/Parkin-mediated mitophagy. No biomarkers of mitophagy, measures of mitophagic flux, assays for Parkin recruitment, or mechanistic investigations on the impact of nanotechnology on the PINK1/Parkin pathway have been reported.	The study emphasizes the theoretical significance of PINK1/Parkin-mediated mitophagy in Parkinson's disease and examines mitochondrial nanomedicine as a potential treatment approach. Nonetheless, it concurrently exposes a significant research deficiency: there is little direct evidence illustrating the impact of nanotechnology-based therapeutics on PINK1/Parkin-dependent mitophagy pathways. This …
Role of a novel (−)-epigallocatechin-3-gallate delivery system on the prevention against oxidative stress damage in vitro and in vivo model of Parkinson's disease	Sánchez-Giraldo V.; Monsalve Y.; Palacio J.; Mendivil-Perez M.; Sierra L.; Velez-Pardo C.; López B.L.; Jiménez-Del-Rio M. 2020	Scopus	https://doi.org/10.1016/j.jddst.2019.101466	Exclude	Missing downstream mitophagy markers	Evaluated a novel (-)-epigallocatechin-3-gallate (EGCG) delivery system using engineered chitosan-based core-shell nanoparticles (~35 nm, Pluronic F127SDS mixed micelles). The study utilized both in vitro and in vivo (parkin knockdown Drosophila) models of Parkinson's disease to measure prevention against oxidative stress, DJ-1 protein oxidation, and anti-apoptotic markers (Caspase-3 activation a…	Completely lacked direct, explicit measurements of downstream functional mitophagy cascade flux or degradation metrics. While it utilized a parkin knockdown model to induce Parkinsonian traits, it failed to track or explain how the nanoparticle delivery system interacted with or rescued the specific mitochondrial clearance mechanisms of the PINK1/Parkin pathway.	This exemplar highlights a major gap in current literature: studies frequently utilize genetic pathway models (like parkin knockdowns) to test engineered nanoparticles, but they pivot exclusively to measuring generalized cellular outcomes (antioxidant and anti-apoptotic effects). There is a distinct lack of research focusing on how these nanoparticle matrices directly influence, rescue, or alter …
Gene therapy for Parkinson's disease	Denyer R.; Douglas M.R. 2012	Scopus	https://doi.org/10.1155/2012/757305	Exclude	Review article	This review examined gene therapy approaches in Parkinson's disease, including viral and nonviral delivery systems, dopamine synthesis enhancement, basal ganglia circuit modulation, and neurotrophic factor therapies. The paper summarized the preclinical and clinical studies conducted which involved targets like AADC, GAD, GDNF, and neurturin while discussing challenges associated with translating…	Though the review briefly mentioned Parkin, PINK1, and other genetic forms of Parkinson's disease, it doesn't specifically investigate the PINK1/Parkin-mediated mitophagy pathway. The paper didn't examine mitochondrial quality-control mechanisms, downstream mitophagy biomarkers, nanoparticle-based mitochondrial targeting, or therapeutic strategies which are designed to restore PINK1/Parkin signal…	This matters since it highlights a major gap in the Parkinson's disease gene therapy literature. This shows that even a comprehensive review of emerging gene therapy strategies largely overlooked the role of PINK1/Parkin-mediated mitophagy and its potenital as a therapeutic target. This shows that the research field involving mitochondrial quality control, mitophagy, and targeted delivery systems…
Using Extracellular Vesicles Released by GDNF-Transfected Macrophages for Therapy of Parkinson Disease	Zhao Y.; Haney M.J.; Fallon J.K.; Rodriguez M.; Swain C.J.; Arzt C.J.; Smith P.C.; Loop M.S.; Harrison E.B.; El-hage N.; Batrakova E.V.	Scopus	https://doi.org/10.3390/cells11121933	Exclude	Missing downstream mitophagy markers	This study created a macrophage-derived extracellular vesicle (EV) nanoplatform containing GDNF and assessed its therapeutic effectiveness in a transgenic Parkin Q311X(A) animal model of Parkinson's disease. The scientists evaluated nanoparticle characteristics, GDNF delivery, motor behaviour, dopaminergic neuron viability, and neuroinflammatory effects subsequent to intranasal injection of EV-GD…	The study utilized a Parkin-mutant mouse model; however, it did not evaluate PINK1-Parkin signalling, mitophagic flux, mitochondrial quality control, Parkin recruitment to impaired mitochondria, autophagosome formation, mitochondrial clearance, or other direct indicators of mitophagy. The mechanistic implications of EV-GDNF on the PINK1/Parkin mitophagy pathway were not investigated.	This study illustrates an increasing interest in nanotechnology-based treatments for Parkinson's disease and employs a Parkin-associated illness model. Nevertheless, it underscores a substantial deficiency in the literature: nanotherapeutic approaches are frequently assessed based on neuroprotection and behavioural enhancement without ascertaining if these advantages are facilitated through the r…
Microglial autophagy in Alzheimer’s disease and Parkinson’s disease	Wang Z.; Wang Q.; Li S.; Li X.-J.; Yang W.; He D., 2023	Scopus	https://doi.org/10.3389/fnagi.2022.1065183	Exclude	Review article	The core models that was used in this research study included the role of microglial autophagy in the pathogenesis of Alzheimer's disease and Parkinson's disease. This article discusses the influence of protein aggregates such as amyloid beta, tau and alpha synuclein. The finindgs varie from animal models, human disease research and cell culture studies.	It did not entirely focus on the PINK1/Parkin-mediated pathway. This research article included molecular pathways on mitochondrial dysfunction, mitochondrial quality control, and other nanoparticle-based modulation of the PINK1/Parkin pathway, which were not comprehensively examined. The review did not provide an in-depth discussion on how the PINK1/Parkin signaling influences microglial response…	The omission of the detailed PINK1/Parkin- mitophagy helps highlight the gap in understanding how mitochondrial quality control can contribute to microglial dysfunction and neuroinflammation in neurodegenerative disorders. Further investigation of the PINK1/Parkin pathways can reveal that there are therapeutic targets and mechanisms that are not addressed by studies focusing on general autophagy.
A Comprehensive Study of miRNAs in Parkinson’s Disease: Diagnostics and Therapeutic Approaches	Owais S.; Siddique Y.H. 2023	Scopus	https://doi.org/10.2174/1871527321666220111152756	Exclude	Review article	This paper is a review that discusses the roles of microRNAs in Parkinson's disease and they key pathological processes, such a alpha-synuclein aggregation, mitochondrial dysfunction, oxidative stress and neuroinflammation. The paper highlights miRNAs as a potential diagnostic biomarkers that could enable earlier and more accurate detection of PD. The authors also examined the therapeutic potenti…	While the review discussed potential treatments for PD uses miRNAs, it does not mention a PINK1/Parkin-mediated pathway.	SInce the study does not address how miRNAs influence PINK1 stabilization, Parkin activation or downstreatments, it can not connect miRNA to mitochondrial health. Since mitochondiral dysfunction is linked to the progression of PD, not addressing the PINK1/Parkin pathway leaves out one ofthe most important linkes between miRNAs and PD pathology. This highlights a gap since we don't know whether mi…
Rescue of mitochondrial function in parkin-mutant fibroblasts using drug loaded PMPC-PDPA polymersomes and tubular polymersomes	Yealland G.; Battaglia G.; Bandmann O.; Mortiboys H., 2016	Scopus	http://dx.doi.org/10.1016/j.neulet.2016.06.065	Exclude	Duplicate from PubMed result	This research examined the administration of ursolic acid (UA) and ursocholanic acid (UCA) via PMPC-PDPA polymeric nanoparticles in primary fibroblasts obtained from individuals with parkin mutations. The scientists evaluated nanoparticle absorption, cytotoxicity, mitochondrial membrane potential, and intracellular ATP concentrations to ascertain if nanoparticle-mediated medication delivery might…	Although employing a Parkin-mutant cellular model, the study failed to investigate PINK1-Parkin signalling, Parkin recruitment to impaired mitochondria, mitophagic flux, autophagosome formation, lysosomal degradation of mitochondria, mitochondrial turnover, or any direct assessments of mitophagy. The mechanistic function of the PINK1/Parkin pathway was not examined.	This study illustrates that nanotechnology-based therapies are being investigated to enhance mitochondrial function in Parkinson's disease mice with parkin mutations. Nonetheless, it exposes a significant deficiency in the literature: enhancements in mitochondrial function are often documented without directly evaluating the impact of nanoparticle-based therapy on PINK1/Parkin-mediated mitophagy.…
Exosomes from human periapical Cyst-MSCs: Theranostic application in Parkinson’s disease	Tatullo M.; Marrelli B.; Zullo M.J.; Codispoti B.; Paduano F.; Benincasa C.; Fortunato F.; Scacco S.; Zavan B.; Cocco T., 2020	Scopus	http://medsci.org/v17p0657.pdf	Exclude	Review paper/Missing downstream mitophagy markers	The thing that was studied was the connection between circadian rhythm disruption, exosomes/extracellular vesicles, and PD disease progression, especially though how exosomes might carry PD-related molecules and other biomarkers. The author focuses on whether exosomes could be useful for early diagnosis, biomarker discovery, drug testing, and future therapies in PD. As a review, the main proposed…	This article mentioned the PINK1 and Parkin are linked to mitochondrial damage, mitochondrial quality control, and PD, explaining that PINK1 activates Parkin through ubiquitin phosphorylation. It does not experimentally show how PINK1/Parkin-mediated mitophagy changes exosome content in PD models.	This article matters because it shows that exosomes may reflect what is happening inside PD cells, especially changes related to mitochondrial stress and neuroinflammation. However, even though the article discusses PINK1/Parkin and mitochondrial damage, it does not fully explain whether PINK1/Patkin-related mitophagy defects directly change exosome cargo. This highlights an important literature …
				#REF!
				#REF!
				#REF!
				#REF!
				#REF!
				#REF!
				#REF!
				#REF!
				#REF!
				#REF!
				#REF!
				#REF!
				#REF!
				#REF!
